# Supplementary material for: Experimental and computational crystal structure landscape study of nigerloxin: a fungal metabolite from Aspergillus niger
Source: Royal Society of Chemistry journal article supplement (doi:10.1039/c5ce02572a), 2016-01-01
Supplement: c5ce02572a1.pdf [file c5ce02572a1.pdf]

# Electronic supplementary information (ESI)

## Experimental and Computational Crystal Structure Landscape Study of Nigerloxin: a Fungal Metabolite from *Aspergillus niger*

Shiv Shankar Singh,<sup>a, c</sup> Vasantha K. Y.,<sup>b</sup> A. P. Sattur,<sup>b</sup> Tejender S. Thakur<sup>a, c, \*</sup>

<sup>a</sup>Molecular and Structural Biology Division, CSIR-Central Drug Research Institute, Lucknow 226 031, India

<sup>b</sup>Microbiology and Fermentation Technology Department CSIR-Central Food Technological Research Institute, Mysore, India

<sup>c</sup>Academy of Scientific and Innovative Research (AcSIR), Anusandhan Bhawan, New Delhi, India

Email: tejender.thakur@cdri.res.in

### Table of Contents

| Items     | Description                                                                                                                                                                                                                                    | Page No. |
|-----------|------------------------------------------------------------------------------------------------------------------------------------------------------------------------------------------------------------------------------------------------|----------|
| Table S1  | ESPD derived atomic charges used in CSP run for nigerloxin and water molecule.                                                                                                                                                                 | S2       |
| Table S2  | Unit cell parameters and packing energies for the top 50 predicted crystal structures for nigerloxin ( $Z' = 1$ ).                                                                                                                             | S2       |
| Table S3  | Unit cell parameters and packing energies for the top 50 predicted crystal structures for nigerloxin monohydrate.                                                                                                                              | S4       |
| Table S4  | Relative occurrences of various supramolecular synthons in CSD.                                                                                                                                                                                | S5       |
| Table S5  | Radical scavenging/Biological activities for some of the 4H-pyranone derivatives from literature.                                                                                                                                              | S6       |
| Table S6  | Relative stabilities of 0-D growth units for nigerloxin calculated at M06x/6-311G++(d,p) level.                                                                                                                                                | S6       |
| Table S7  | Growth units identified from CSP study of nigerloxin ( $Z' = 1$ ) and their relative frequencies in the top 50 predicted crystal structures.                                                                                                   | S7       |
| Table S8  | Growth units identified from CSP study of nigerloxin monohydrate form and their relative frequencies in the top 50 predicted crystal structures.                                                                                               | S8       |
| Table S9  | Relative frequencies for the higher order supramolecular constructs obtained from 1HA obtained from the CSP of nigerloxin monohydrate.                                                                                                         | S8       |
| Figure S1 | <b>Figure S1</b> ORTEP diagrams representing the asymmetric units of the nigerloxin (a) dioxane water solvate, <b>1a</b> and (b) monohydrate form, <b>1b</b> . Displacement ellipsoids for non-H atoms are drawn at the 50% probability level. | S9       |
| Figure S2 | Relative contributions from various types of contacts to the total Hirshfeld surface of nigerloxin molecule in <b>1a</b> and <b>1b</b> .                                                                                                       | S9       |
| Figure S3 | Electrostatic potential map for nigerloxin molecule indicating possible hydration sites. Nucleophilic and electrophilic regions are shown with blue and red contour lines.                                                                     | S10      |
| Figure S4 | Packing energy versus density plots for top 100 predicted crystal structures for (a) Nigerloxin anhydrous form ( $Z' = 1$ ) and (b) nigerloxin monohydrate form.                                                                               | S10      |
| Figure S5 | Packing of 1D tapes of nigerloxin and water molecule in the hypothetical desolvated form obtained from <b>1a</b> on removing dioxane molecules.                                                                                                | S11      |
| Figure S6 | Optimized geometries for the 4H-pyranone derivatives and their oxy-radicals.                                                                                                                                                                   | S12      |
| Figure S7 | 3-D molecular network observed in the CSP generated crystal structure for nigerloxin anhydrate. Symbol "Ö" represents a molecular chain propagating in the direction perpendicular to the plane of paper.                                      | S13      |
| Figure S8 | Growth units identified in the CSP generated crystal structure for nigerloxin monohydrate                                                                                                                                                      | S14      |

## Tables

**Table S1** ESPD derived atomic charges used in CSP run for nigerloxin and water molecule.

| Molecule   | Atom Number | $q_{\text{espd}}$ |
|------------|-------------|-------------------|
| Nigerloxin | O1          | -0.3272           |
|            | O2          | -0.5151           |
|            | O3          | -0.5145           |
|            | O4          | -0.5466           |
|            | O5          | -0.5361           |
|            | N1          | -0.8741           |
|            | C2          | 0.2065            |
|            | C3          | -0.4630           |
|            | C4          | 0.6425            |
|            | C5          | -0.0444           |
|            | C6          | 0.3872            |
|            | C7          | 0.7870            |
|            | C8          | 0.8764            |
|            | C9          | -0.3383           |
|            | C10         | 0.0082            |
|            | C11         | -0.1325           |
|            | H1N         | 0.4458            |
| H5A        | 0.4412      |                   |
| H9         | 0.2059      |                   |
| H10        | 0.1116      |                   |
| H11A       | 0.0567      |                   |
| H11B       | 0.0615      |                   |
| H11C       | 0.0611      |                   |
| Water      | O7          | -0.7924           |
|            | H7A         | 0.3962            |
|            | H7B         | 0.3962            |

**Table S2** Unit cell parameters and packing energies for the top 50 predicted crystal structures for nigerloxin ( $Z' = 1$ ).

| Rank | Space group                                     | a (Å) | b (Å) | c (Å) | $\Sigma$ (°) | T (°) | Y (°) | V (Å <sup>3</sup> ) | $\rho$ (g/cm <sup>3</sup> ) | Packing energy (kcal/mol) |
|------|-------------------------------------------------|-------|-------|-------|--------------|-------|-------|---------------------|-----------------------------|---------------------------|
| 1    | <i>P2<sub>1</sub>/c</i>                         | 5.35  | 19.12 | 9.09  | 90           | 99.9  | 90    | 915                 | 1.60                        | -39.42                    |
| 2    | <i>C2/c</i>                                     | 19.50 | 5.07  | 20.25 | 90           | 108.2 | 90    | 1900                | 1.55                        | -37.42                    |
| 3    | <i>P1</i>                                       | 5.25  | 9.74  | 10.08 | 71.3         | 87.4  | 78.1  | 478                 | 1.54                        | -37.40                    |
| 4    | <i>P2<sub>1</sub>2<sub>1</sub>2<sub>1</sub></i> | 5.48  | 6.58  | 26.95 | 90           | 90    | 90    | 972                 | 1.51                        | -35.59                    |
| 5    | <i>Pbcn</i>                                     | 26.92 | 8.55  | 8.54  | 90           | 90    | 90    | 1964                | 1.50                        | -34.56                    |
| 6    | <i>R3</i>                                       | 23.66 | 23.66 | 9.69  | 90           | 90    | 120.0 | 4698                | 1.41                        | -34.56                    |
| 7    | <i>P2/c</i>                                     | 12.11 | 4.31  | 18.95 | 90           | 94.7  | 90    | 986                 | 1.49                        | -34.24                    |
| 8    | <i>Pccn</i>                                     | 8.50  | 28.35 | 8.33  | 90           | 90.0  | 90    | 2007                | 1.46                        | -33.35                    |
| 9    | <i>P2<sub>1</sub>2<sub>1</sub>2</i>             | 8.48  | 24.07 | 4.89  | 90           | 90.0  | 90    | 999                 | 1.47                        | -33.00                    |
| 10   | <i>C2/c</i>                                     | 10.21 | 19.04 | 9.84  | 90           | 98.2  | 90    | 1892                | 1.55                        | -36.47                    |
| 11   | <i>P2<sub>1</sub>2<sub>1</sub>2<sub>1</sub></i> | 7.29  | 9.39  | 14.42 | 90           | 90.0  | 90    | 986                 | 1.49                        | -35.56                    |
| 12   | <i>P2<sub>1</sub></i>                           | 9.23  | 4.91  | 11.22 | 90           | 93.3  | 90    | 507                 | 1.45                        | -34.43                    |
| 13   | <i>Pnnm</i>                                     | 8.73  | 18.95 | 6.26  | 90           | 90.0  | 90    | 1035                | 1.42                        | -32.98                    |
| 14   | <i>I2</i>                                       | 10.29 | 4.07  | 23.42 | 90           | 93.6  | 90    | 978                 | 1.50                        | -34.27                    |
| 15   | <i>Pbca</i>                                     | 7.85  | 14.83 | 17.87 | 90           | 90.0  | 90    | 2080                | 1.41                        | -33.75                    |
| 16   | <i>Pnma</i>                                     | 8.54  | 6.22  | 18.27 | 90           | 90.0  | 90    | 970                 | 1.51                        | -34.15                    |
| 17   | <i>Pna2<sub>1</sub></i>                         | 16.67 | 12.29 | 5.01  | 90           | 90.0  | 90    | 1027                | 1.43                        | -33.60                    |
| 18   | <i>C2/c</i>                                     | 24.99 | 4.35  | 18.89 | 90           | 111.9 | 90    | 1906                | 1.54                        | -35.76                    |
| 19   | <i>P2<sub>1</sub>2<sub>1</sub>2<sub>1</sub></i> | 4.76  | 13.13 | 15.74 | 90           | 90.0  | 90    | 984                 | 1.49                        | -33.92                    |

|    |                                                 |       |       |       |    |       |    |      |      |        |
|----|-------------------------------------------------|-------|-------|-------|----|-------|----|------|------|--------|
| 20 | <i>Pna2<sub>1</sub></i>                         | 9.35  | 19.06 | 5.74  | 90 | 90.0  | 90 | 1022 | 1.44 | -34.01 |
| 21 | <i>Pbca</i>                                     | 8.48  | 12.91 | 18.45 | 90 | 90.0  | 90 | 2021 | 1.45 | -33.12 |
| 22 | <i>Pna2<sub>1</sub></i>                         | 8.52  | 24.16 | 4.89  | 90 | 90.0  | 90 | 1006 | 1.46 | -33.00 |
| 23 | <i>P2<sub>1</sub>/n</i>                         | 10.28 | 5.02  | 19.13 | 90 | 98.1  | 90 | 977  | 1.50 | -37.23 |
| 24 | <i>P2<sub>1</sub>/n</i>                         | 14.06 | 5.00  | 14.14 | 90 | 97.7  | 90 | 986  | 1.49 | -35.87 |
| 25 | <i>I2/a</i>                                     | 19.07 | 5.17  | 21.12 | 90 | 107.7 | 90 | 1982 | 1.48 | -35.25 |
| 26 | <i>C2/m</i>                                     | 12.85 | 6.53  | 13.53 | 90 | 102.9 | 90 | 1106 | 1.33 | -33.14 |
| 27 | <i>P2<sub>1</sub>/n</i>                         | 10.69 | 7.39  | 13.19 | 90 | 99.4  | 90 | 1028 | 1.43 | -34.85 |
| 28 | <i>P2<sub>1</sub>2<sub>1</sub>2<sub>1</sub></i> | 4.40  | 14.46 | 15.87 | 90 | 90.0  | 90 | 1009 | 1.46 | -33.37 |
| 29 | <i>C2/c</i>                                     | 8.17  | 19.12 | 12.39 | 90 | 92.4  | 90 | 1934 | 1.52 | -35.55 |
| 30 | <i>Pn</i>                                       | 5.71  | 15.24 | 5.81  | 90 | 96.6  | 90 | 502  | 1.46 | -34.53 |
| 31 | <i>P2<sub>1</sub>/n</i>                         | 5.90  | 15.19 | 10.73 | 90 | 100.3 | 90 | 946  | 1.55 | -34.85 |
| 32 | <i>P2/n</i>                                     | 10.07 | 4.13  | 23.26 | 90 | 92.2  | 90 | 966  | 1.52 | -33.54 |
| 33 | <i>C2/c</i>                                     | 12.85 | 13.18 | 12.89 | 90 | 103.8 | 90 | 2120 | 1.39 | -34.83 |
| 34 | <i>P2<sub>1</sub>2<sub>1</sub>2<sub>1</sub></i> | 4.47  | 11.46 | 19.06 | 90 | 90.0  | 90 | 977  | 1.50 | -33.03 |
| 35 | <i>P2/n</i>                                     | 9.65  | 5.16  | 19.96 | 90 | 98.2  | 90 | 983  | 1.49 | -33.60 |
| 36 | <i>P2<sub>1</sub>/n</i>                         | 5.73  | 6.22  | 27.93 | 90 | 90.6  | 90 | 995  | 1.48 | -34.77 |
| 37 | <i>P2<sub>1</sub>/n</i>                         | 5.58  | 31.57 | 5.82  | 90 | 97.5  | 90 | 1016 | 1.45 | -34.72 |
| 38 | <i>I2/a</i>                                     | 20.61 | 4.00  | 24.95 | 90 | 109.4 | 90 | 1940 | 1.51 | -34.46 |
| 39 | <i>P2<sub>1</sub></i>                           | 6.26  | 5.75  | 14.41 | 90 | 96.0  | 90 | 515  | 1.43 | -34.13 |
| 40 | <i>I2</i>                                       | 15.10 | 4.53  | 15.67 | 90 | 113.0 | 90 | 987  | 1.49 | -33.01 |
| 41 | <i>C2/c</i>                                     | 11.12 | 15.19 | 11.95 | 90 | 110.7 | 90 | 1888 | 1.56 | -34.44 |
| 42 | <i>P2<sub>1</sub>/n</i>                         | 7.54  | 6.92  | 19.93 | 90 | 96.4  | 90 | 1035 | 1.42 | -34.72 |
| 43 | <i>P2<sub>1</sub></i>                           | 6.53  | 5.87  | 12.88 | 90 | 90.1  | 90 | 493  | 1.49 | -33.88 |
| 44 | <i>C2/c</i>                                     | 12.93 | 13.15 | 12.58 | 90 | 103.6 | 90 | 2078 | 1.41 | -33.70 |
| 45 | <i>C2/c</i>                                     | 17.41 | 5.23  | 22.90 | 90 | 102.8 | 90 | 2032 | 1.45 | -33.36 |
| 46 | <i>C2/c</i>                                     | 25.12 | 4.81  | 17.00 | 90 | 100.4 | 90 | 2021 | 1.45 | -33.36 |
| 47 | <i>I2/a</i>                                     | 9.91  | 20.22 | 10.79 | 90 | 99.6  | 90 | 2132 | 1.38 | -34.17 |
| 48 | <i>P2<sub>1</sub>/c</i>                         | 6.65  | 19.20 | 7.36  | 90 | 91.2  | 90 | 939  | 1.56 | -34.62 |
| 49 | <i>C2/c</i>                                     | 15.87 | 7.58  | 16.67 | 90 | 94.6  | 90 | 1998 | 1.47 | -34.01 |
| 50 | <i>C2/c</i>                                     | 13.45 | 18.27 | 8.52  | 90 | 104.2 | 90 | 2030 | 1.45 | -33.87 |

**CSP** protocol: (1) Packing (2) Clustering, (3) Geometry Optimization and (4) Clustering.

List of space groups used in prediction: *P2<sub>1</sub>/c*, *P1*, *P2<sub>1</sub>2<sub>1</sub>2<sub>1</sub>*, *C2/c*, *P2<sub>1</sub>*, *Pbca*, *Pna2<sub>1</sub>*, *Pnma*, *Cc*, *P1*, *Pbcn*, *C2*, *Pca2<sub>1</sub>*, *P2<sub>1</sub>/m*, *P2/c*, *C2/m*, *R3*, *P2<sub>1</sub>2<sub>1</sub>2*, *Pc*, *Pccn*

**(1) ---- Packing parameters ----**

Search algorithm : MC Simulated Annealing  
Maximum number of steps : 7000  
Explore torsions : No  
Pre-optimize structures : No  
Steps to accept before cooling : 12  
Minimum move factor : 0.1000E-08  
Heating factor : 0.02500  
Maximum temperature : 100000.0 K  
Minimum temperature : 300.0 K

**(2) ---- Cluster analysis parameters ----**

Cluster grouping : Forcefield type  
Cutoff : 7.000  
Number of bins : 140  
Tolerance : 0.1300  
Maximum number of clusters : All clusters

**(3)---- Geometry optimization parameters ----**

Algorithm : Smart  
**Convergence tolerance:**  
Energy : 0.0001 kcal/mol  
Force : 0.005 kcal/mol/A  
Stress : 0.005 GPa  
Displacement : 5e-005 A  
Maximum number of iterations : 5000  
External pressure : 0 GPa  
Motion groups rigid : YES  
Optimize cell : YES

**---- Energy parameters ----**

Forcefield : Dreiding

**Electrostatic terms:**

Summation method : Ewald

Accuracy : 0.0001 kcal/mol  
 Buffer width : 0.5 Å  
**van der Waals terms:**  
 Summation method : Ewald  
 Accuracy : 0.0001 kcal/mol  
 Repulsive cutoff : 6 Å  
 Buffer width : 0.5 Å  
**(4) ---- Polymorph Clustering parameters ----**  
 Cluster grouping : Forcefield type  
 Cutoff : 7.000  
 Number of bins : 140  
 Tolerance : 0.2100  
 Maximum number of clusters : All clusters

**Table S3** Unit cell parameters and packing energies for the top 50 predicted crystal structures for nigerloxin monohydrate.

| Rank      | Space group                                     | a (Å)        | b (Å)       | c (Å)       | $\Sigma$ (°) | T (°)       | Y (°)     | V (Å <sup>3</sup> ) | $\rho$ (g/cm <sup>3</sup> ) | Packing energy (kcal/mol) |
|-----------|-------------------------------------------------|--------------|-------------|-------------|--------------|-------------|-----------|---------------------|-----------------------------|---------------------------|
| 1         | <i>P1</i>                                       | 5.24         | 8.61        | 12.19       | 99.0         | 100.0       | 104.5     | 513                 | 1.55                        | -53.19                    |
| 2         | <i>P1</i>                                       | 5.32         | 8.56        | 12.25       | 97.8         | 98.2        | 104.5     | 525                 | 1.51                        | -52.56                    |
| 3         | <i>P2<sub>1</sub>/c</i>                         | 10.29        | 5.28        | 20.25       | 90           | 94.7        | 90        | 1097                | 1.45                        | -52.20                    |
| 4         | <i>P2<sub>1</sub>/n</i>                         | 5.15         | 24.85       | 8.43        | 90           | 102.0       | 90        | 1054                | 1.51                        | -52.13                    |
| 5         | <i>P2<sub>1</sub>/n</i>                         | 7.24         | 5.26        | 27.16       | 90           | 93.6        | 90        | 1032                | 1.54                        | -52.05                    |
| 6         | <i>P2<sub>1</sub>/c</i>                         | 12.03        | 8.85        | 10.18       | 90           | 108.9       | 90        | 1025                | 1.55                        | -51.98                    |
| 7         | <i>P1</i>                                       | 5.91         | 6.95        | 12.97       | 84.8         | 86.9        | 87.0      | 529                 | 1.50                        | -51.69                    |
| 8         | <i>P2<sub>1</sub>/c</i>                         | 6.20         | 6.41        | 26.19       | 90           | 93.0        | 90        | 1039                | 1.53                        | -51.66                    |
| 9         | <i>P1</i>                                       | 6.08         | 6.70        | 13.37       | 104.0        | 95.2        | 92.0      | 525                 | 1.51                        | -51.61                    |
| 10        | <i>P2<sub>1</sub>/n</i>                         | 5.36         | 20.09       | 10.37       | 90           | 97.5        | 90        | 1108                | 1.43                        | -51.55                    |
| 11        | <i>P2<sub>1</sub>/n</i>                         | 5.23         | 24.46       | 8.68        | 90           | 105.3       | 90        | 1070                | 1.49                        | -51.45                    |
| 12        | <i>P1</i>                                       | 6.31         | 6.96        | 12.43       | 100.3        | 93.0        | 96.7      | 532                 | 1.49                        | -51.42                    |
| 13        | <i>Pbca</i>                                     | 8.86         | 9.95        | 23.72       | 90           | 90          | 90        | 2091                | 1.52                        | -51.33                    |
| <b>14</b> | <b><i>C2/c</i></b>                              | <b>26.54</b> | <b>8.85</b> | <b>9.03</b> | <b>90</b>    | <b>94.6</b> | <b>90</b> | <b>2115</b>         | <b>1.50</b>                 | <b>-51.28</b>             |
| 15        | <i>P2<sub>1</sub>/n</i>                         | 5.52         | 27.80       | 7.06        | 90           | 91.1        | 90        | 1084                | 1.47                        | -51.15                    |
| 16        | <i>P1</i>                                       | 5.32         | 8.78        | 12.21       | 107.5        | 93.5        | 106.2     | 515                 | 1.54                        | -51.09                    |
| 17        | <i>P2<sub>1</sub>/c</i>                         | 13.74        | 8.89        | 8.92        | 90           | 104.4       | 90        | 1055                | 1.51                        | -51.08                    |
| 18        | <i>Ia</i>                                       | 5.75         | 23.53       | 8.37        | 90           | 97.9        | 90        | 1122                | 1.42                        | -51.07                    |
| 19        | <i>P1</i>                                       | 7.74         | 7.75        | 8.86        | 99.6         | 94.0        | 96.4      | 519                 | 1.53                        | -50.84                    |
| 20        | <i>P1</i>                                       | 5.99         | 7.47        | 12.28       | 96.1         | 103.6       | 98.4      | 522                 | 1.52                        | -50.81                    |
| 21        | <i>P1</i>                                       | 5.01         | 7.41        | 14.33       | 83.3         | 87.9        | 83.8      | 525                 | 1.51                        | -50.76                    |
| 22        | <i>P1</i>                                       | 5.19         | 6.70        | 15.55       | 93.5         | 93.7        | 95.5      | 536                 | 1.48                        | -50.66                    |
| 23        | <i>P2<sub>1</sub>/n</i>                         | 5.87         | 29.49       | 6.27        | 90           | 94.0        | 90        | 1081                | 1.47                        | -50.65                    |
| 24        | <i>P1</i>                                       | 4.68         | 7.28        | 15.77       | 78.4         | 89.2        | 86.1      | 525                 | 1.51                        | -50.64                    |
| 25        | <i>P1</i>                                       | 6.70         | 8.61        | 10.35       | 88.9         | 79.2        | 74.3      | 564                 | 1.41                        | -50.63                    |
| 26        | <i>P1</i>                                       | 5.04         | 7.80        | 14.43       | 93.3         | 97.1        | 100.5     | 551                 | 1.44                        | -50.56                    |
| 27        | <i>P2<sub>1</sub>2<sub>1</sub>2<sub>1</sub></i> | 5.43         | 6.70        | 29.61       | 90           | 90          | 90        | 1078                | 1.47                        | -50.56                    |
| 28        | <i>Pccn</i>                                     | 8.84         | 30.66       | 7.91        | 90           | 90          | 90        | 2144                | 1.48                        | -50.50                    |
| 29        | <i>P1</i>                                       | 4.61         | 7.26        | 15.40       | 87.5         | 82.5        | 85.9      | 509                 | 1.56                        | -50.46                    |
| 30        | <i>P1</i>                                       | 7.78         | 7.92        | 8.85        | 89.5         | 80.2        | 80.5      | 530                 | 1.50                        | -50.46                    |
| 31        | <i>P1</i>                                       | 5.12         | 7.48        | 15.05       | 86.2         | 80.5        | 79.9      | 559                 | 1.42                        | -50.40                    |
| 32        | <i>P1</i>                                       | 5.37         | 8.86        | 12.13       | 83.8         | 90.0        | 74.0      | 552                 | 1.44                        | -50.39                    |
| 33        | <i>Pbca</i>                                     | 8.87         | 8.53        | 28.36       | 90           | 90          | 90        | 2146                | 1.48                        | -50.37                    |
| 34        | <i>P2<sub>1</sub>/c</i>                         | 8.69         | 23.63       | 5.26        | 90           | 105.7       | 90        | 1040                | 1.53                        | -50.37                    |
| 35        | <i>P2<sub>1</sub>/c</i>                         | 7.59         | 27.40       | 5.00        | 90           | 94.2        | 90        | 1036                | 1.53                        | -50.36                    |
| 36        | <i>P1</i>                                       | 6.84         | 8.86        | 9.26        | 95.8         | 102.1       | 102.0     | 530                 | 1.50                        | -50.32                    |
| 37        | <i>P2<sub>1</sub>/n</i>                         | 10.28        | 8.84        | 11.53       | 90           | 91.5        | 90        | 1047                | 1.52                        | -50.30                    |
| 38        | <i>C2</i>                                       | 8.89         | 8.85        | 13.97       | 90           | 102.7       | 90        | 1073                | 1.48                        | -50.28                    |
| 39        | <i>P2<sub>1</sub>/c</i>                         | 5.54         | 11.45       | 17.58       | 90           | 98.3        | 90        | 1104                | 1.44                        | -50.26                    |
| 40        | <i>P2<sub>1</sub>/c</i>                         | 11.33        | 8.82        | 10.71       | 90           | 99.3        | 90        | 1056                | 1.50                        | -50.25                    |
| 41        | <i>P1</i>                                       | 7.10         | 8.90        | 9.33        | 90.4         | 104.2       | 110.3     | 533                 | 1.49                        | -50.24                    |
| 42        | <i>P2<sub>1</sub>/c</i>                         | 5.17         | 30.30       | 7.12        | 90           | 99.8        | 90        | 1098                | 1.45                        | -50.21                    |

|           |                         |              |             |              |           |              |           |             |             |               |
|-----------|-------------------------|--------------|-------------|--------------|-----------|--------------|-----------|-------------|-------------|---------------|
| 43        | <i>P2<sub>1</sub>/n</i> | 5.20         | 17.38       | 11.16        | 90        | 97.0         | 90        | 1001        | 1.59        | -50.13        |
| 44        | <i>C2/m</i>             | 20.58        | 6.44        | 8.63         | 90        | 94.8         | 90        | 1139        | 1.39        | -50.08        |
| 45        | <i>P1</i>               | 5.51         | 7.83        | 13.09        | 104.6     | 101.4        | 91.2      | 533         | 1.49        | -50.08        |
| 46        | <i>Pbcn</i>             | 30.09        | 8.85        | 8.17         | 90        | 90           | 90        | 2175        | 1.46        | -50.08        |
| 47        | <i>Pca2<sub>1</sub></i> | 27.33        | 7.59        | 4.98         | 90        | 90           | 90        | 1032        | 1.54        | -49.96        |
| 48        | <i>P2<sub>1</sub>/n</i> | 5.17         | 28.12       | 7.78         | 90        | 96.5         | 90        | 1123        | 1.41        | -49.95        |
| 49        | <i>P2<sub>1</sub>/n</i> | 5.11         | 31.04       | 6.75         | 90        | 95.3         | 90        | 90          | 1.49        | -49.94        |
| 50        | <i>P1</i>               | 5.54         | 8.83        | 11.35        | 103.1     | 97.0         | 94.4      | 534         | 1.49        | -49.90        |
| <b>89</b> | <b><i>P21/c</i></b>     | <b>10.22</b> | <b>8.84</b> | <b>12.59</b> | <b>90</b> | <b>110.7</b> | <b>90</b> | <b>1064</b> | <b>1.49</b> | <b>-49.42</b> |

**Table S4** Relative occurrences of various supramolecular synthons in CSD.

| Query                                                                               | Growth unit | Total hits |
|-------------------------------------------------------------------------------------|-------------|------------|
| 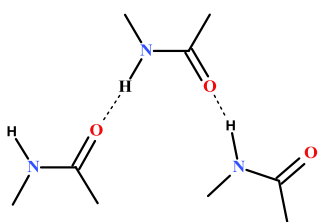   | 1A/1B       | 4413       |
|    | 0A          | 2405       |
|  | 0B          | 175        |
|  | 0F          | 60         |
|  | 0E          | 5          |

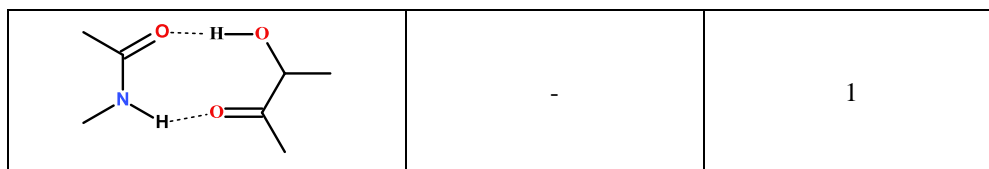

**CSD search criteria:** 3D coordinates determined, No disorder, No errors, Not polymeric, No ions, No powder structures, Only organic molecules

**Table S5** Radical scavenging/Biological activities for some of the 4-pyranone derivatives from literature.

| Assays used               | Unit <sup>#</sup>        | Kojic acid       | Maltol            | Nigerloxin        |
|---------------------------|--------------------------|------------------|-------------------|-------------------|
| DPPH                      | ED <sub>50</sub> (μM)    | -                | -                 | 66 <sup>4,5</sup> |
| OH radical                | IC <sub>50</sub> (μg/ml) | -                | 0.63 <sup>3</sup> | -                 |
| ONOO <sup>-</sup>         | IC <sub>50</sub> (μg/ml) | -                | 1.0 <sup>3</sup>  | -                 |
| Polyphenol oxidase        | IC <sub>50</sub> (μM)    | 280 <sup>1</sup> | -                 | -                 |
| Mushroom tyrosinase       | IC <sub>50</sub> (μM)    | 26 <sup>2</sup>  | -                 | -                 |
| Soybean lipoxygenase      | IC <sub>50</sub> (μM)    | 175 <sup>2</sup> | -                 | 79 <sup>4</sup>   |
| Rat lens Aldose Reductase | IC <sub>50</sub> (μM)    | -                | -                 | 69 <sup>4</sup>   |
| Phospho Molebdenum        | Equiv. conc.             | -                | -                 | 3791 <sup>5</sup> |
| ABTS                      | ED <sub>50</sub> (μM)    | -                | -                 | 8.9 <sup>5</sup>  |
| FRAP                      | Equiv. conc.             | -                | -                 | 14.4 <sup>5</sup> |

<sup>#</sup> ED<sub>50</sub> values corresponds to the concentration required for 50% radical scavenging activity compared with the control test in the reaction after certain specific time 30 min 60 min etc. The IC<sub>50</sub> values corresponds to the concentration of the compound required for 50% inhibition of enzyme activity compared with the control test.

1. J. S. Chen, C. Wei, and M. R. Marshall *J. Agric. Food Chem.*, **1991**, 39, 1897-1901.
2. Y. -C. Chen, Y. Sugiyama, N. Abe, R. Kuruto-Niwa, R. Nozawa, and A. Hirota *Biosci. Biotech. Biochem.* **2005**, 69, 999-1006.
3. K. S. Kang, H. Y. Kim, J. S. Pyo and T. Yokuzawa *Biol. Pharm. Bull.* **2006**, 29, 750-754.
4. K. C. S. Rao, S. Divakar, K. N. Babu, N. G. Karanth, A. P. Sattur *J. Antibiotic*, **2002**, 55, 789-793.
5. B. S. Suresha and K. Srinivasan *Appl. Biochem. Microbiol.* **2013**, 49, 587-591.

**Table S6** Relative stabilities of 0-D growth units for nigerloxin calculated at M06x/6-311G++(d,p) level.

| Growth Unit | ΔE (kcal/mol) | ΔE/n  |
|-------------|---------------|-------|
| <b>0A</b>   | -12.49        | -6.25 |
| <b>0B</b>   | -11.75        | -5.88 |
| <b>0C</b>   | -4.05         | -2.03 |
| <b>0D</b>   | unstable      | -     |
| <b>0E</b>   | -19.81        | -6.60 |
| <b>0F</b>   | unstable      | -     |

n= number of molecules in the growth unit

**Table S7** Growth units identified from CSP study of nigerloxin ( $Z' = 1$ ) form and their relative frequencies in the top 50 predicted crystal structures.

| Growth unit | Synthon Combination | Frequency | Predicted nigerloxin crystal structures (rank) exhibiting the growth unit             |
|-------------|---------------------|-----------|---------------------------------------------------------------------------------------|
| 1A          | -                   | 23        | 2, 4, 5, 8, 9, 12, 14, 16, 18, 20, 21, 23, 24, 25, 28, 30, 34, 36, 37, 39, 42, 45, 50 |
| 0B          | -                   | 20        | 2, 3, 6, 7, 14, 18, 23, 25, 26, 27, 32, 33, 35, 38, 40, 42, 44, 45, 46, 47            |
| 0A          | -                   | 17        | 1, 3, 7, 10, 13, 26, 29, 31, 32, 33, 35, 38, 41, 44, 46, 47, 48                       |
| 0C          | -                   | 13        | 2, 3, 18, 23, 25, 33, 42, 44, 45, 47, 32, 35, 38                                      |
| 1C          | -                   | 12        | 4, 5, 8, 9, 13, 16, 21, 30, 36, 37, 39, 50                                            |
| 0D          | -                   | 11        | 1, 3, 10, 18, 23, 25, 29, 31, 38, 41, 48                                              |
| 1E          | 0A+0B               | 10        | 3, 7, 26, 32, 33, 35, 38, 44, 46, 47                                                  |
| 1J          | 1A+1C               | 8         | 5, 8, 9, 16, 21, 30, 37, 50                                                           |
| 1I          | -                   | 7         | 1, 10, 19, 29, 31, 41, 48                                                             |
| 3A          | 0B+0C+1A            | 7         | 2, 14, 18, 23, 25, 42, 45                                                             |
| 2A          | 0A+0D+1I            | 7         | 1, 10, 19, 29, 31, 41, 48                                                             |
| 1G          | -                   | 5         | 15, 27, 40, 43, 49                                                                    |
| 2B          | 0C+1E               | 5         | 3, 26, 33, 44, 47                                                                     |
| 1H          | -                   | 4         | 11, 17, 20, 28                                                                        |
| 0F          | -                   | 3         | 15, 43, 49                                                                            |
| 2C          | 0F+1G               | 3         | 15, 43, 49                                                                            |
| 2E          | 1B+1H               | 3         | 11, 17                                                                                |
| 3C          | 1A+1H               | 3         | 20, 28, 34                                                                            |
| 3D          | 1A+1C               | 3         | 4, 36, 39                                                                             |
| 1B          | -                   | 2         | 11, 17                                                                                |
| 1D          | -                   | 2         | 12, 24                                                                                |
| 2F          | 0B+1G               | 2         | 27, 40                                                                                |
| 3B          | 1A+1D               | 2         | 12, 24                                                                                |
| 0E          | -                   | 1         | 6                                                                                     |
| 1F          | -                   | 1         | 22                                                                                    |
| 1K          | 0A+1C               | 1         | 13                                                                                    |
| 2D          | 0B+0E               | 1         | 6                                                                                     |

**Table S8.** Growth units identified from CSP study of nigerloxin monohydrate form and their relative frequencies in the top 50 predicted crystal structures.

| Growth Unit | Synthon combination | Frequency | Predicted monohydrate structures (rank) exhibiting the growth unit                                  |
|-------------|---------------------|-----------|-----------------------------------------------------------------------------------------------------|
| 1HA         | 1G+W                | 29        | 1, 4, 5, 6, 7, 8, 9, 13, 14, 15, 17, 19, 20, 22, 23, 24, 28, 30, 32, 33, 36, 37, 38, 40, 41, 46, 49 |
| 1HB         | Unique              | 2         | 21, 29                                                                                              |
| 1HC         | 1G+W                | 5         | 2, 11, 12, 48, 50                                                                                   |
| 1HD         | 1G+W                | 1         | 16                                                                                                  |
| 1HE         | 1C+W                | 2         | 25                                                                                                  |
| 1HF         | Unique              | 2         | 26, 31                                                                                              |
| 1HG         | Unique              | 2         | 39, 42                                                                                              |
| 1HH         | 1G+W                | 1         | 43                                                                                                  |
| 1HI         | 1G+W                | 2         | 35, 47                                                                                              |
| 1HJ         | Unique              | 1         | 45                                                                                                  |
| 2HA         | 0B+0C+W             | 1         | 10                                                                                                  |
| 2HB         | 0C+W                | 1         | 31                                                                                                  |
| 2HC         | 1G+W                | 1         | 43                                                                                                  |
| 2HD         | Unique              | 1         | 18                                                                                                  |
| 2HE         | 1G+W                | 1         | 34, 44                                                                                              |
| 2HF         | 1C+W                | 1         | 27                                                                                                  |
| 3HA         | 0B+0C+W             | 1         | 3                                                                                                   |

**Table S9** Relative frequencies for the higher order supramolecular constructs obtained from 1HA obtained from the CSP of nigerloxin monohydrate.

| Supramolecular variant of IHA        | Frequency | Predicted monohydrate structures (rank) exhibiting the growth unit |
|--------------------------------------|-----------|--------------------------------------------------------------------|
| Parallel sheet                       | 14        | 1, 2, 7, 9, 19, 20, 22, 24, 30, 35, 36, 39, 40, 41                 |
| Anti-parallel corrugated sheets      | 6         | 4, 13, 15, 23, 28, 46,                                             |
| Anti-parallel sheets                 | 4         | 14, 17, 33, 38,                                                    |
| Parallel pillared arrangement        | 2         | 5, 8,                                                              |
| Parallel corrugated sheets           | 1         | 49                                                                 |
| Anti-parallel brick wall arrangement | 1         | 32                                                                 |



## Figures

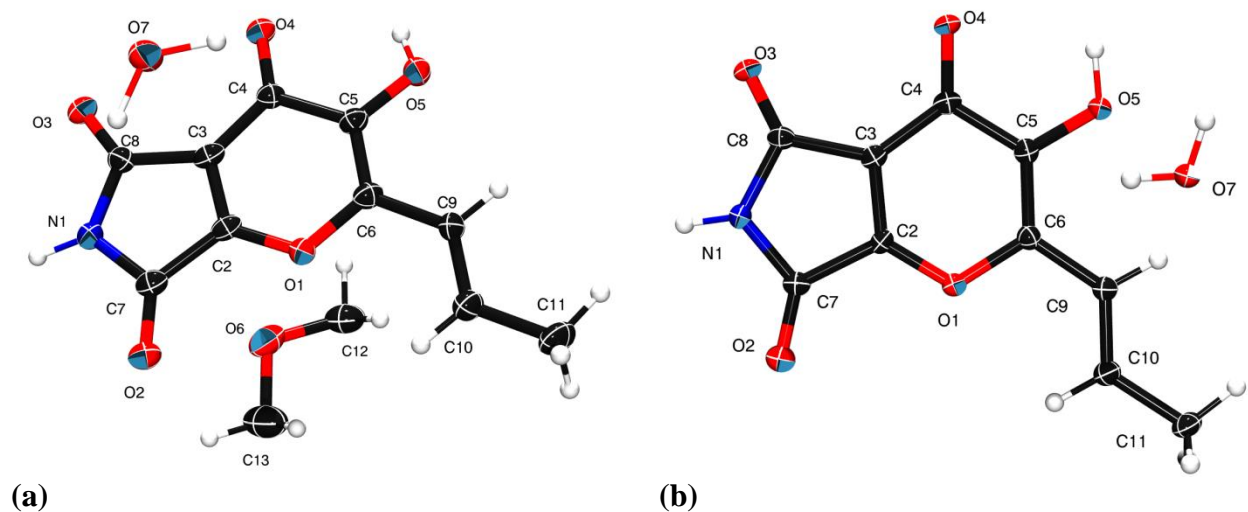

**Figure S1** ORTEP diagrams representing the asymmetric units of the nigerloxin (a) dioxane water solvate, **1a** and (b) monohydrate form, **1b**. Displacement ellipsoids for non-H atoms are drawn at the 50% probability level.

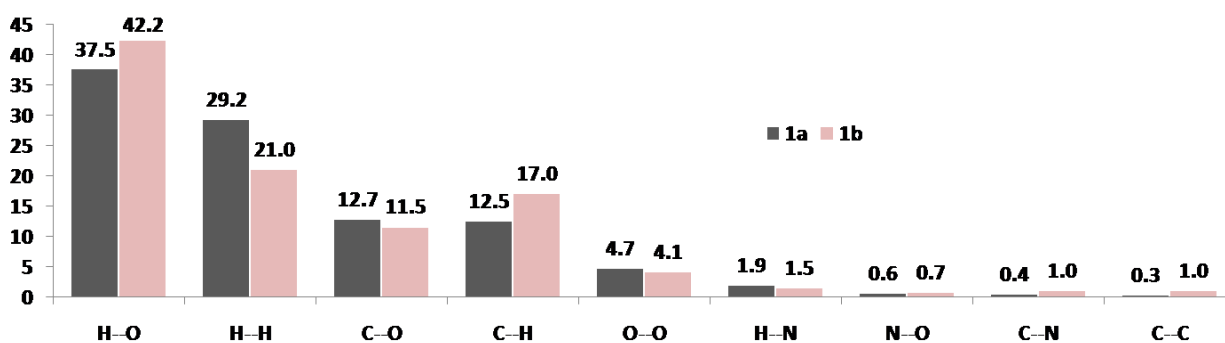

**Figure S2** Relative contributions from various types of contacts to the total Hirshfeld surface of nigerloxin molecule in **1a** and **1b**.

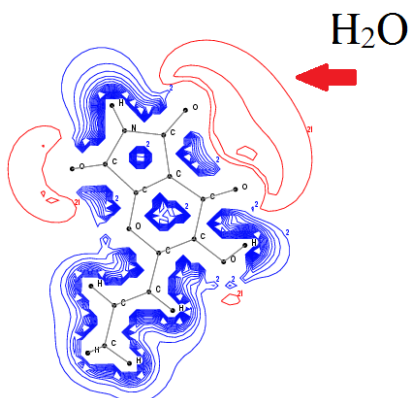

**Figure S3** Electrostatic potential map for nigerloxin molecule indicating possible hydration sites. Nucleophilic and electrophilic regions are shown with blue and red contour lines.

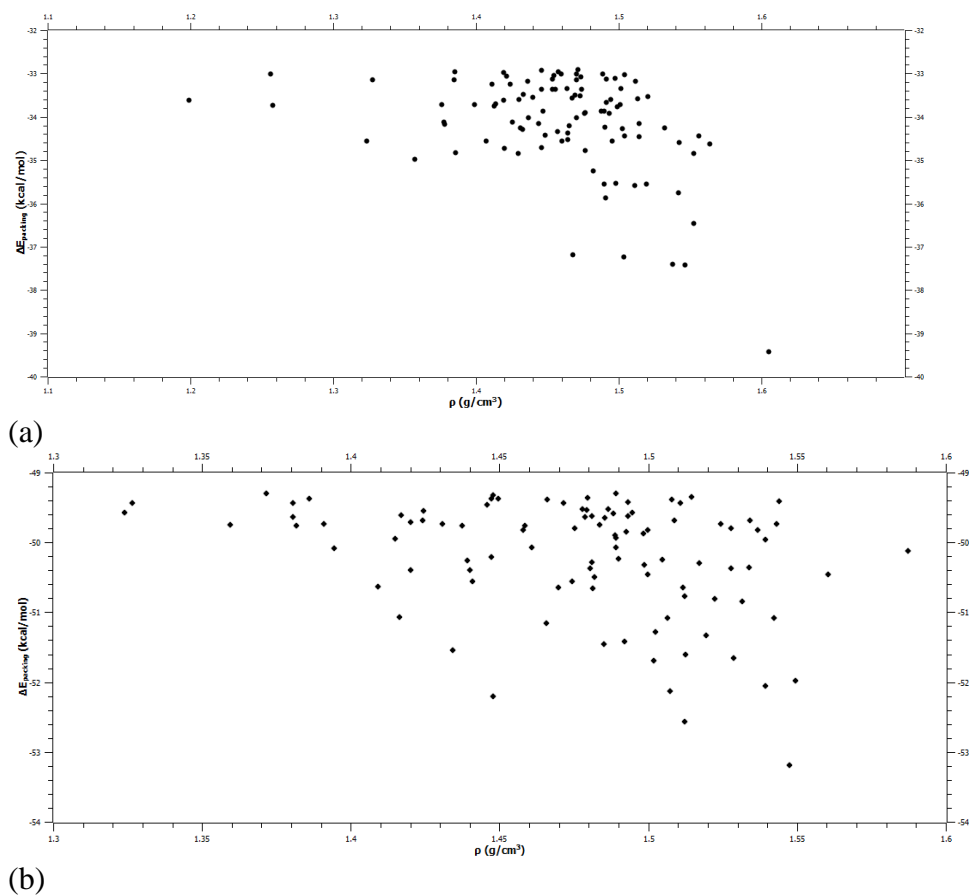

**Figure S4** Packing energy versus density plots for top 100 predicted crystal structures for (a) Nigerloxin anhydrous form ( $Z' = 1$ ) and (b) nigerloxin monohydrate form.

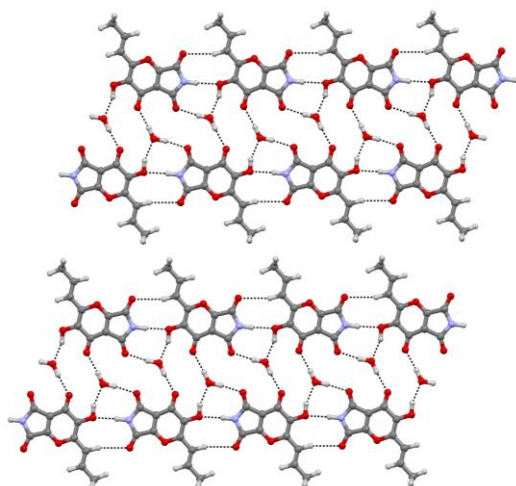

**Figure S5** Packing of 1D tapes of nigerloxin and water molecule in the hypothetical desolvated form obtained from **1a** on removing dioxane molecules.

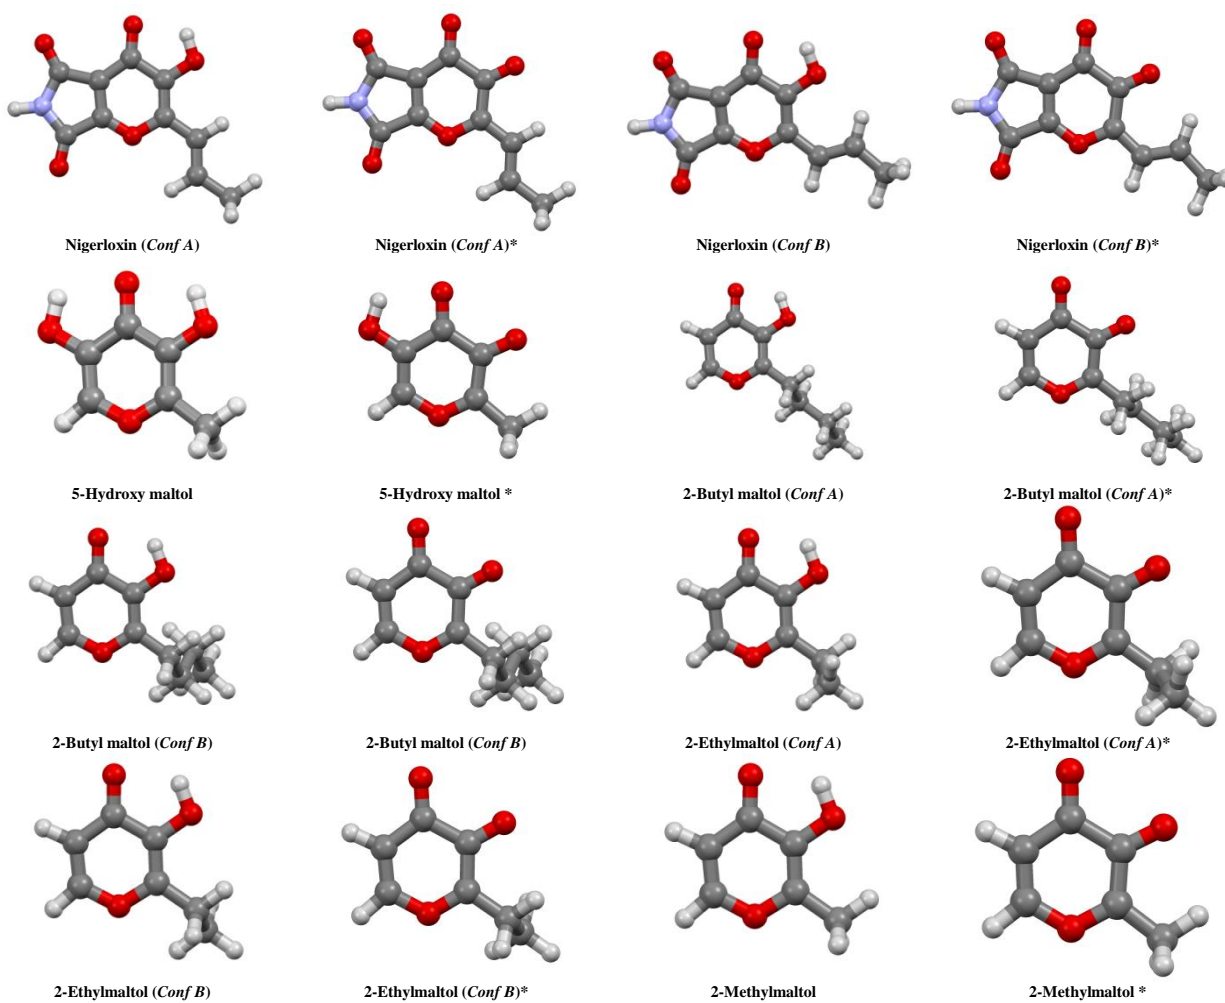

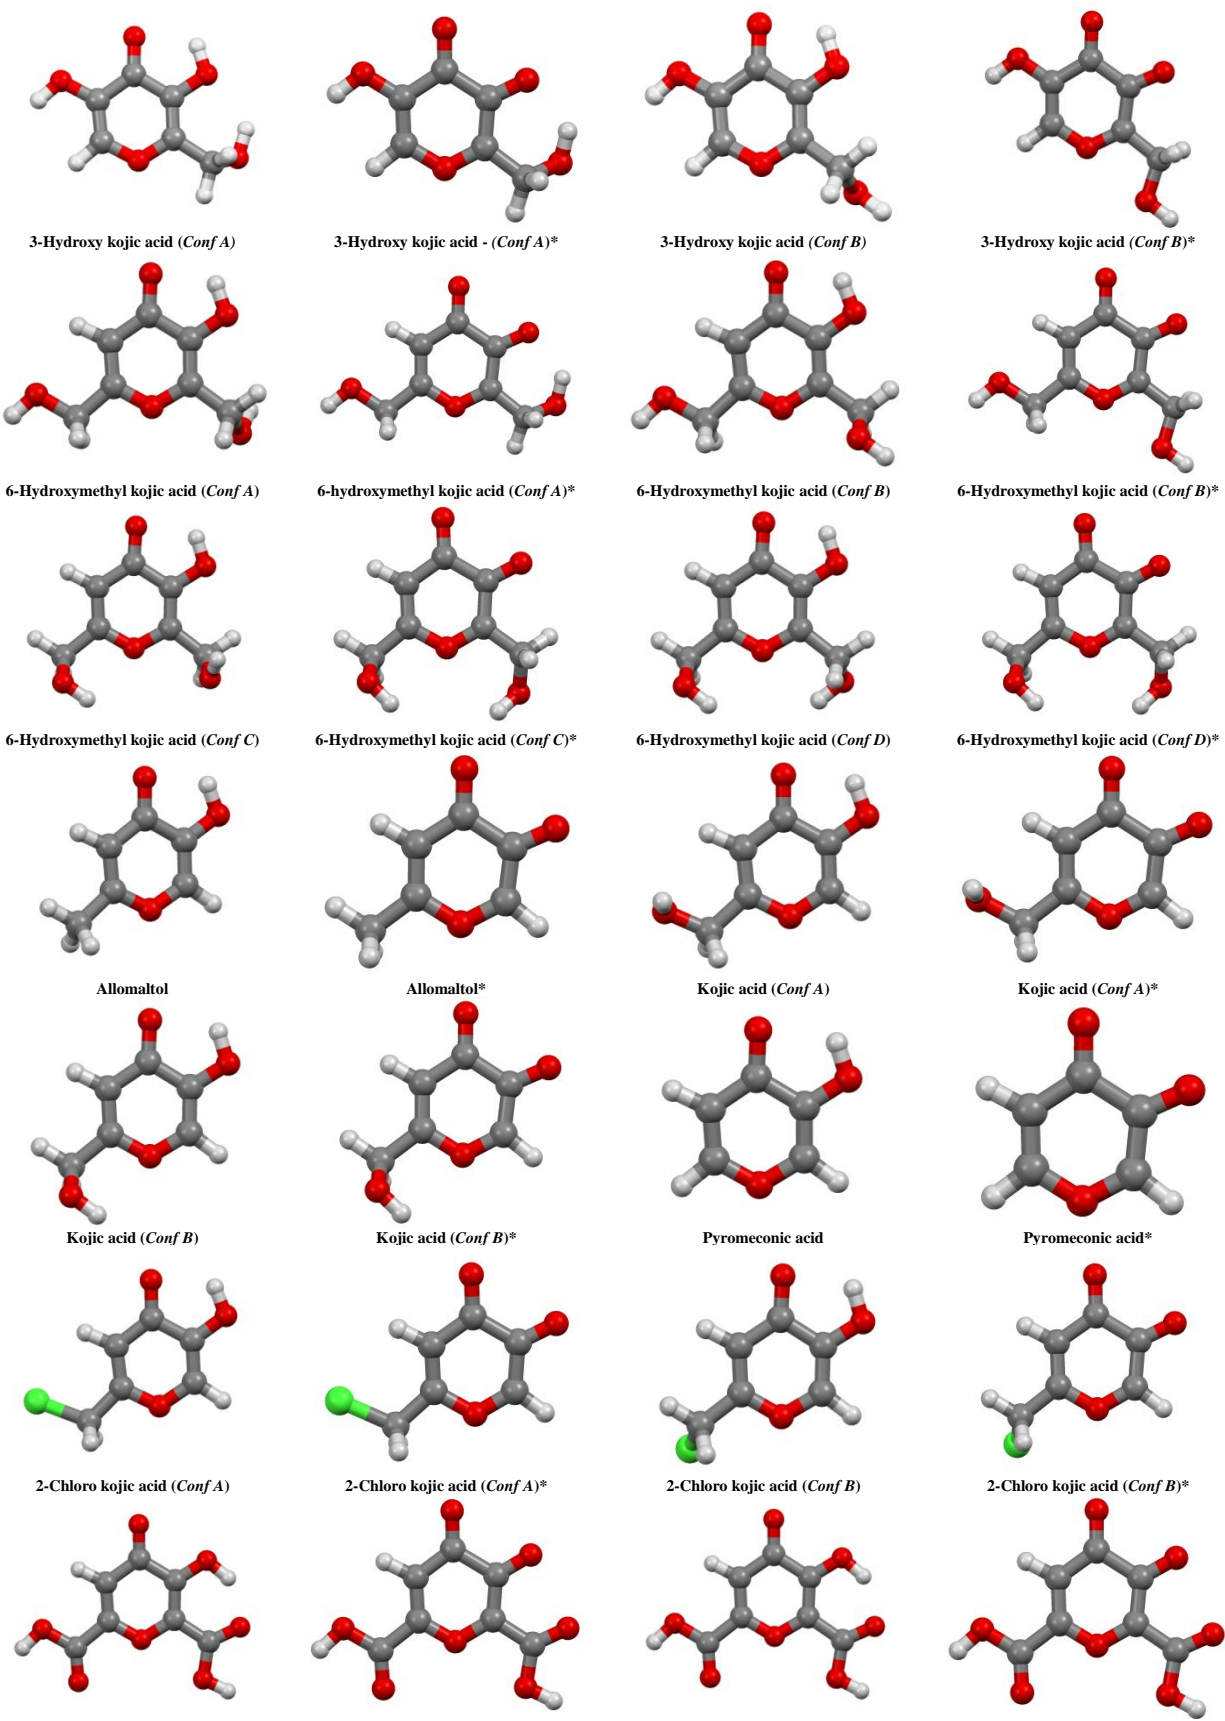

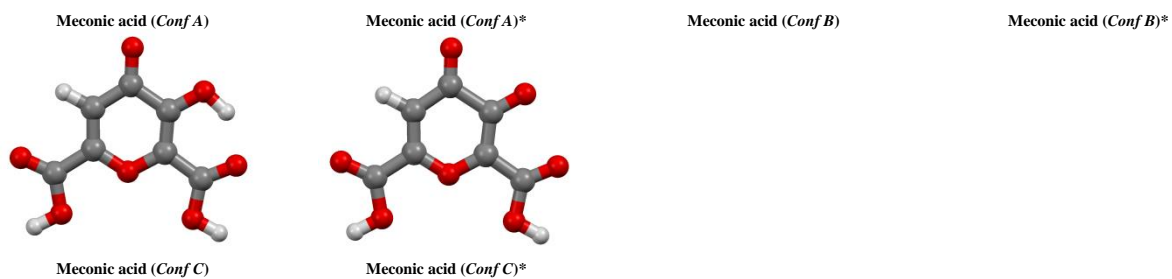

**Figure S6** Optimized geometries for the 4H-pyranone derivatives and their oxy-radicals (\*).

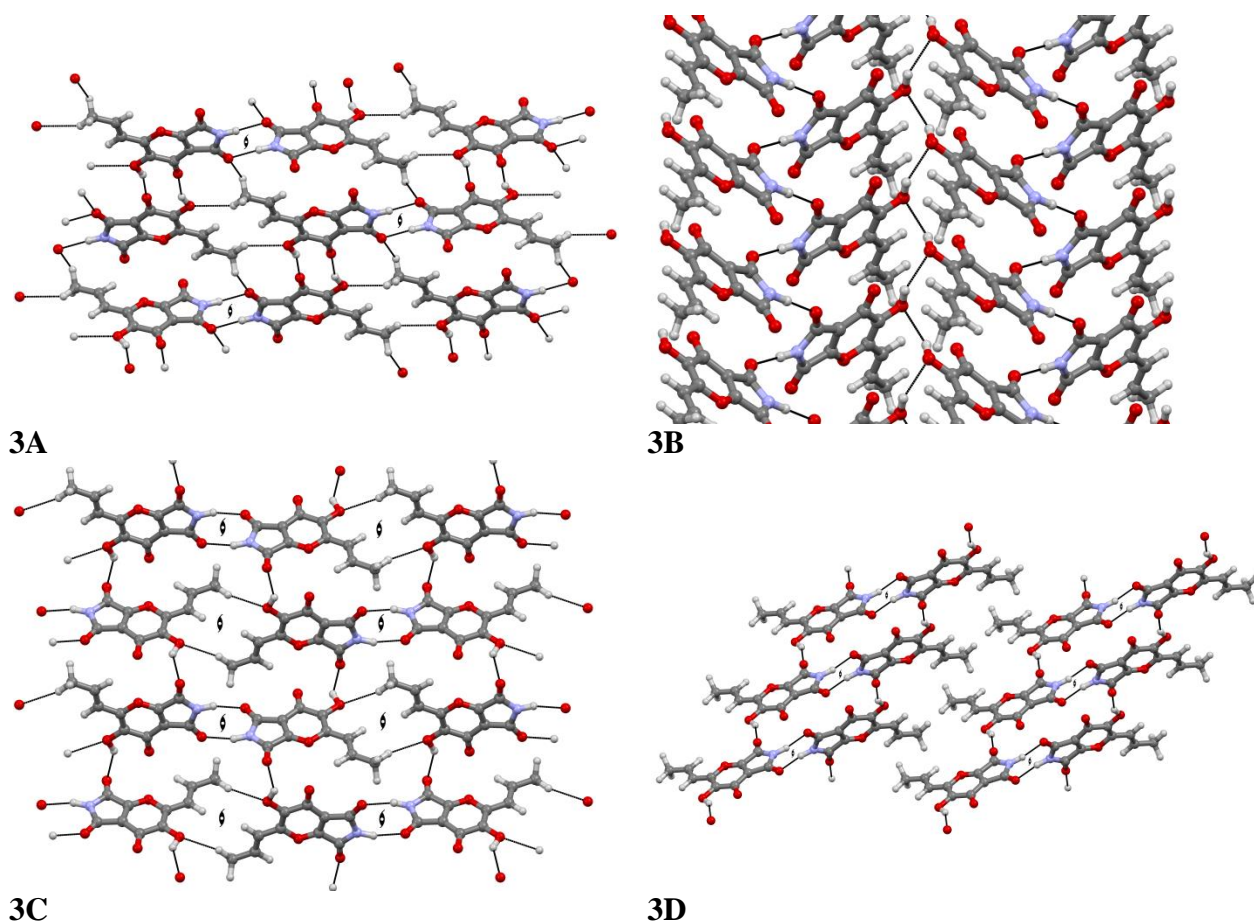

**Figure S7** 3-D molecular network observed in the CSP generated crystal structure for nigerloxin anhydrate. Symbol "O" represents a molecular chain propagating in the direction perpendicular to the plane of paper.

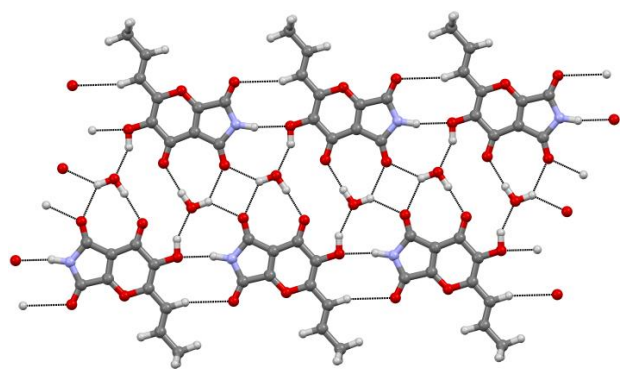

**1HA**

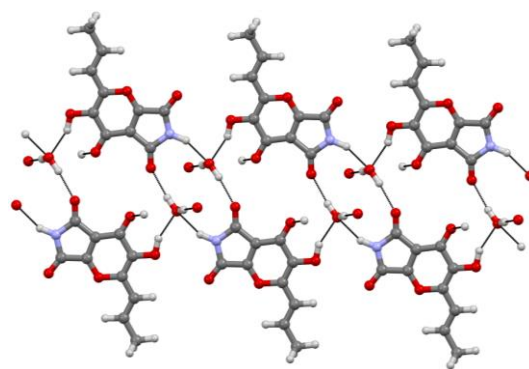

**1HB**

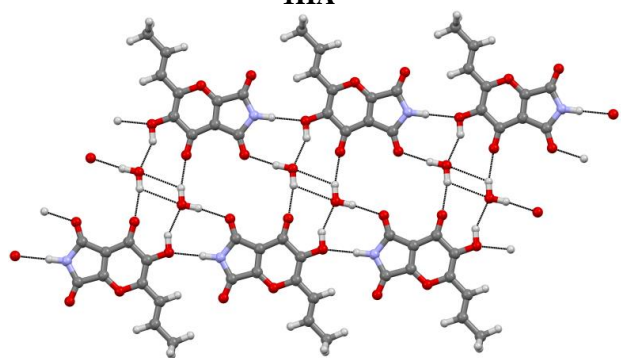

**1HC**

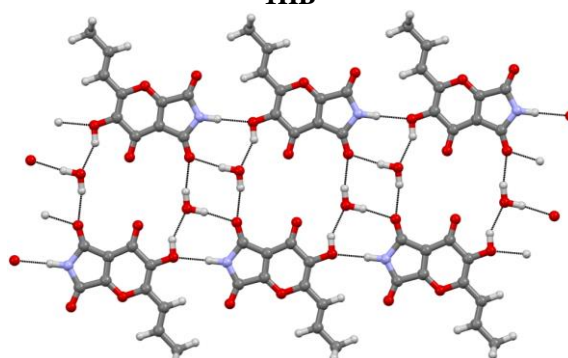

**1HD**

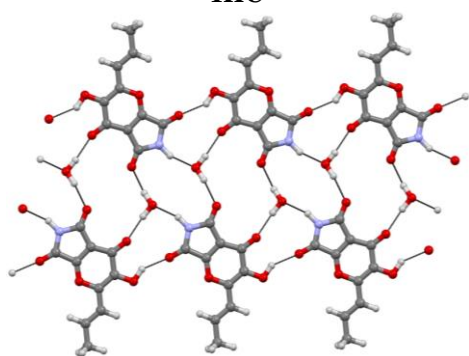

**1HE**

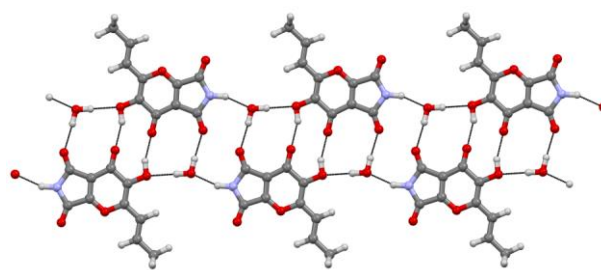

**1HF**

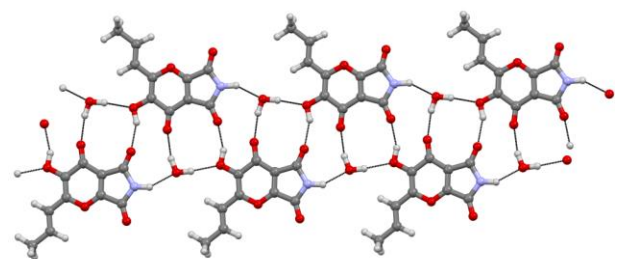

**1HG**

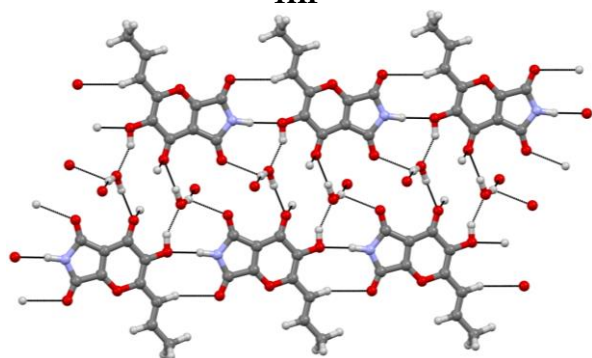

**1HH**

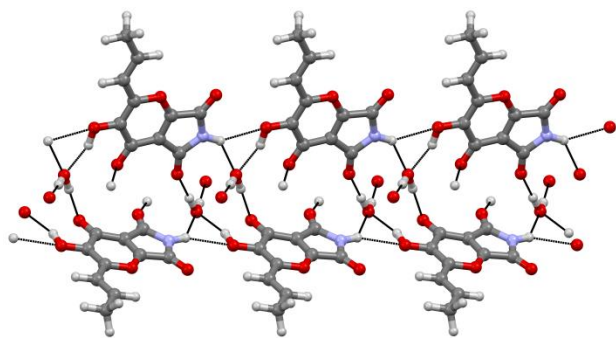

**1HI**

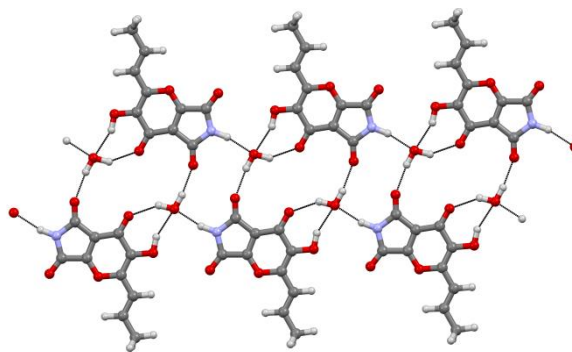

**1HJ**

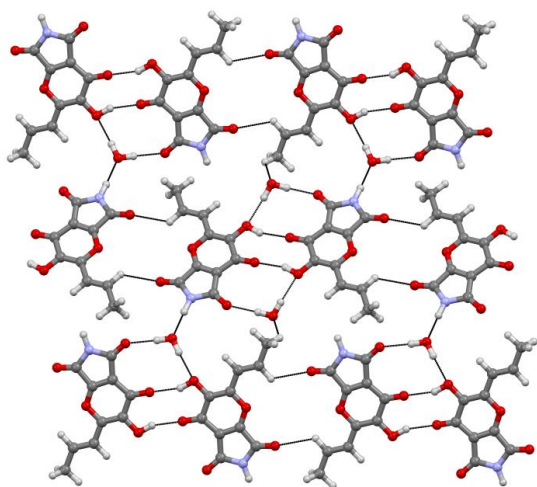

**2HA**

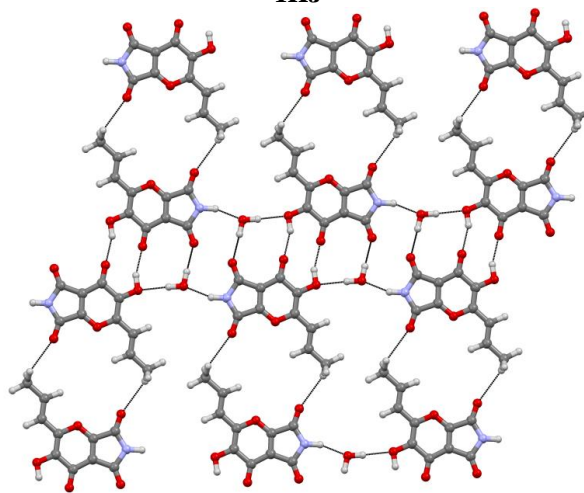

**2HB**

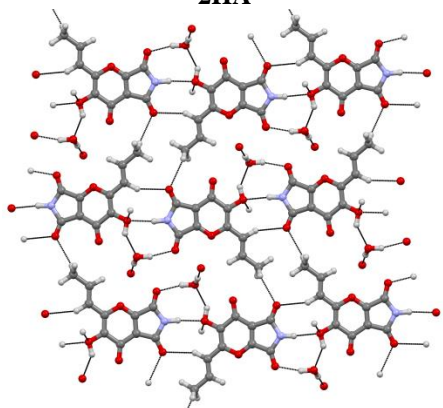

**2HC**

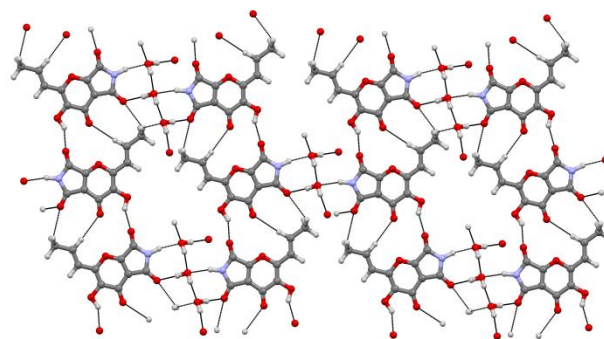

**2HD**

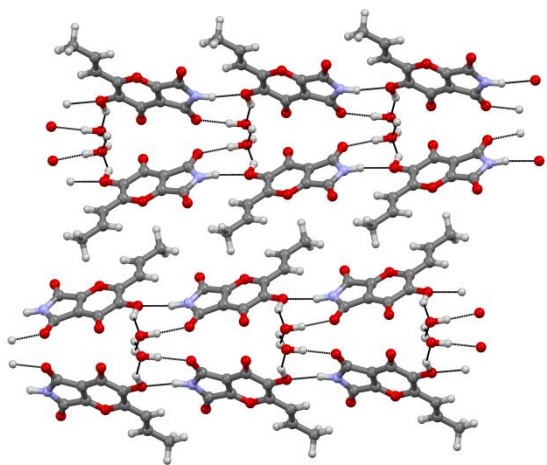

**2HE**

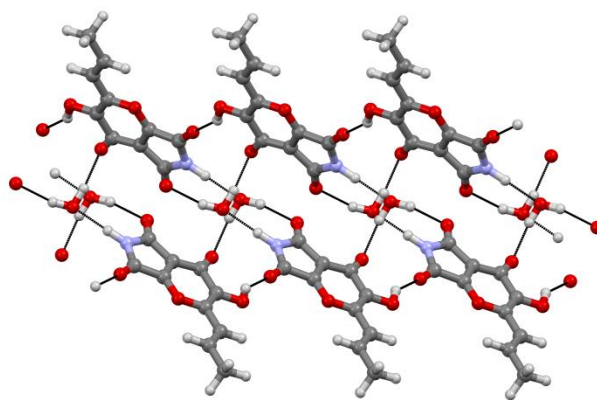

**2HF**

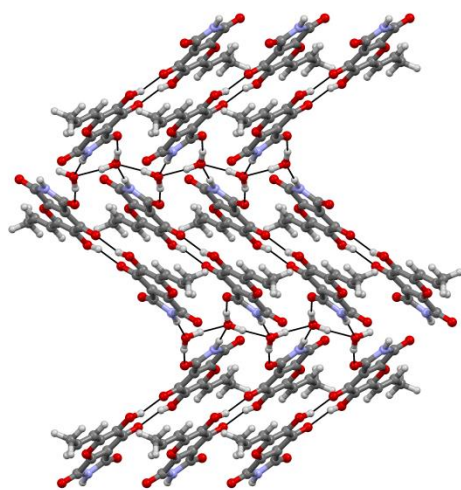

**3HA**

**Figure S8** Growth units identified in the CSP generated crystal structure for nigerloxin monohydrate
